# Supplementary material for: β-catenin-activated autocrine PDGF/Src signaling is a therapeutic target in pancreatic cancer
Source: PubMed Central journal article supplement — Theranostics. 2019 Jan 1;9(2):324–36. doi: 10.7150/thno.28201 (PMC6376185; doi:10.7150/thno.28201), 2019-01-01
Supplement: thnov09p0324s1.pdf [file thnov09p0324s1.pdf]

Figure S1

A

TCGA,provisional

Altered in 21 (11%) of 185 sequenced cases/patients (185 total)

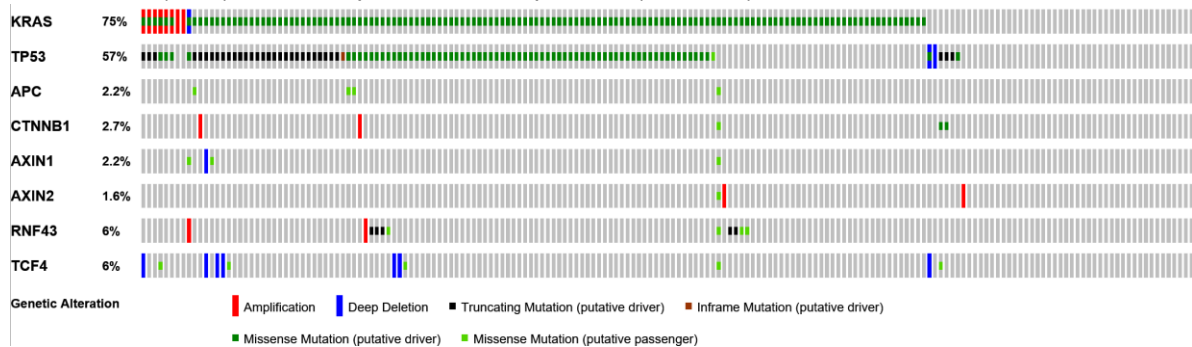

B

UTSW, Nat Commun 2015

Altered in 31 (28%) of 109 sequenced cases/patients (109 total)

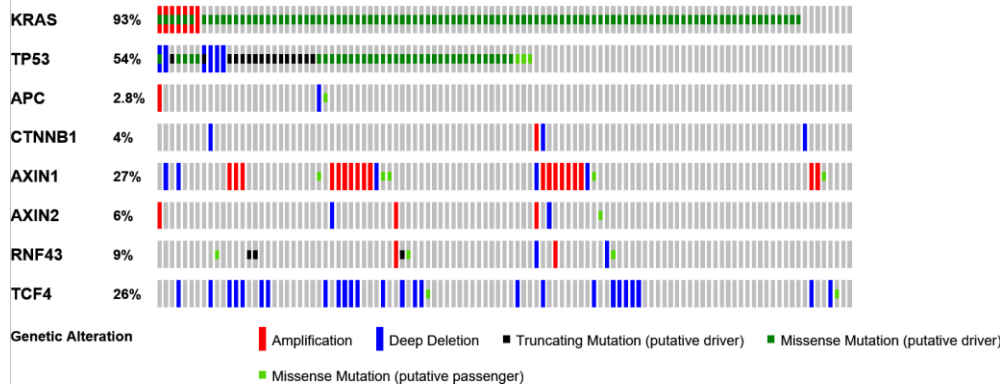

**Figure S1. Co-existence of *K-ras* mutation, *p53* loss and alteration of the WNT/ $\beta$ -catenin signaling molecules in pancreatic cancer.**

(A) Results of genetic alterations of *K-ras*, *p53* and the WNT/ $\beta$ -catenin signaling molecules were extracted from the TCGA provisional database and the co-existence of these defects in pancreatic cancer patients was shown. (B) Another public UTSW database showed the genetic alterations of *K-ras*, *p53* and the WNT/ $\beta$ -catenin mediators in 109 pancreatic cancer patients.

**Figure S2**

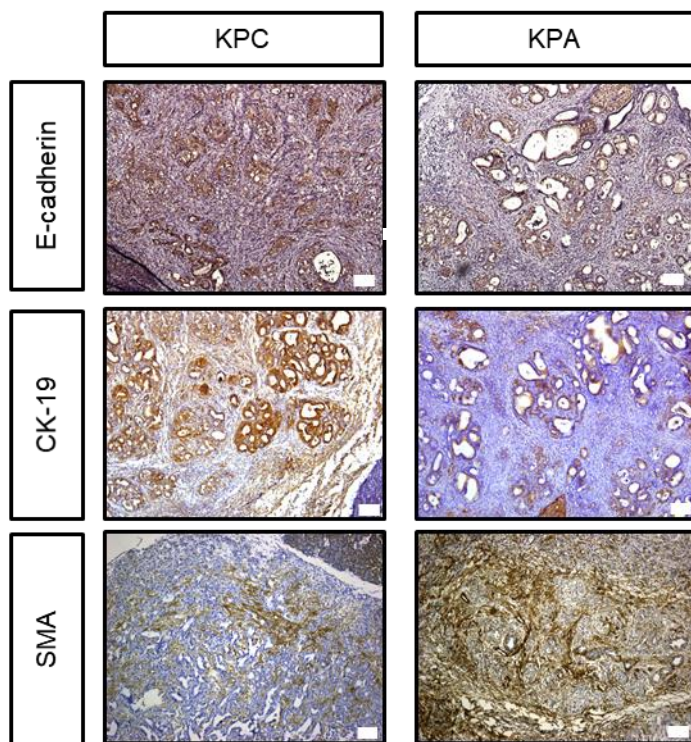

**Figure S2. The KPA tumors are poorly differentiated and highly fibrotic.**

Tumor tissues obtained from the KPC and KPA mice were subjected to immunohistochemical staining and the expressions of E-cadherin, cytokeratin 19 (CK19) and  $\alpha$ -smooth muscle actin (SMA) were compared. The results showed that the staining of CK19 and SMA was increased while the staining of E-cadherin was decreased in the KPA tumors suggesting the KPA tumors are poorly differentiated and highly fibrotic. Scale bars represent 100  $\mu$ m.

**Figure S3**

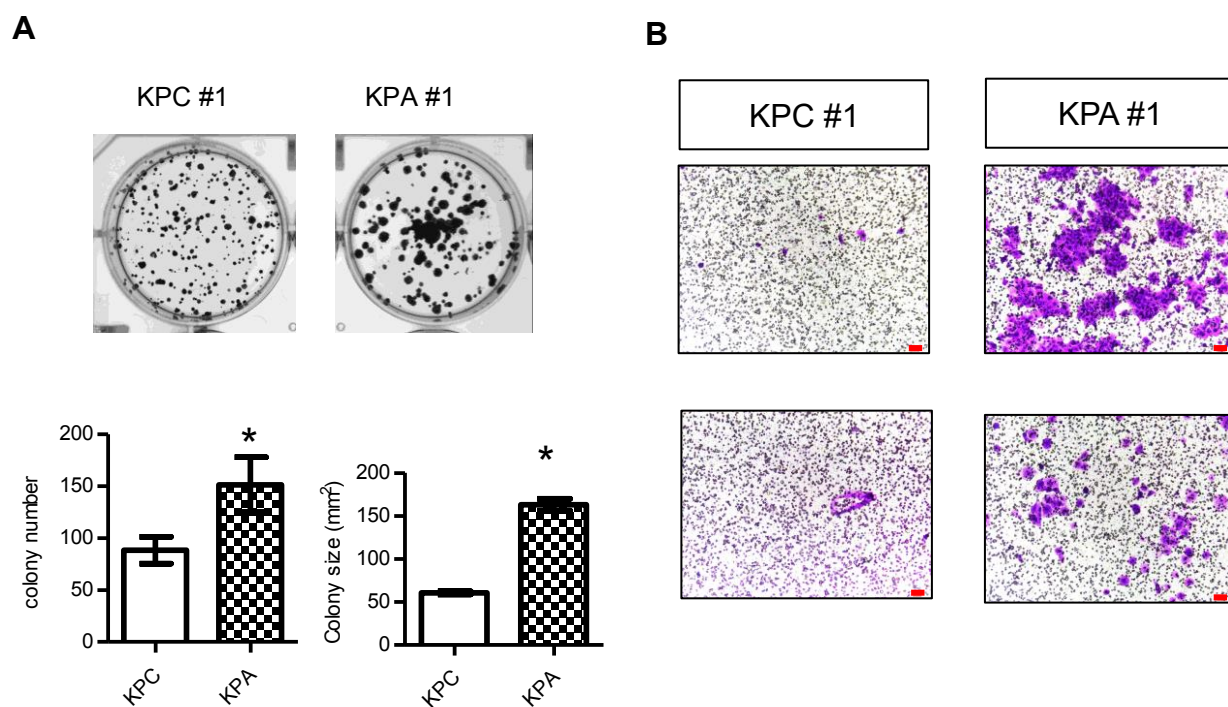

**Figure S3. Tumorigenicity and invasion of the KPC and KPA cancer cells.**

(A) The KPC and KPA cancer cells were subjected to colony formation assay as previously described (13). The number and size of the colonies were compared between these two groups. The results were expressed as Mean $\pm$ SEM (n=3). \* $P$ <0.05. (B) The KPC and KPA cancer cells were subjected to Transwell assay as previously described (13). The data showed the invasive ability is much higher in the KPA cancer cells. Scale bars represent 50  $\mu$ m.

**Figure S4**

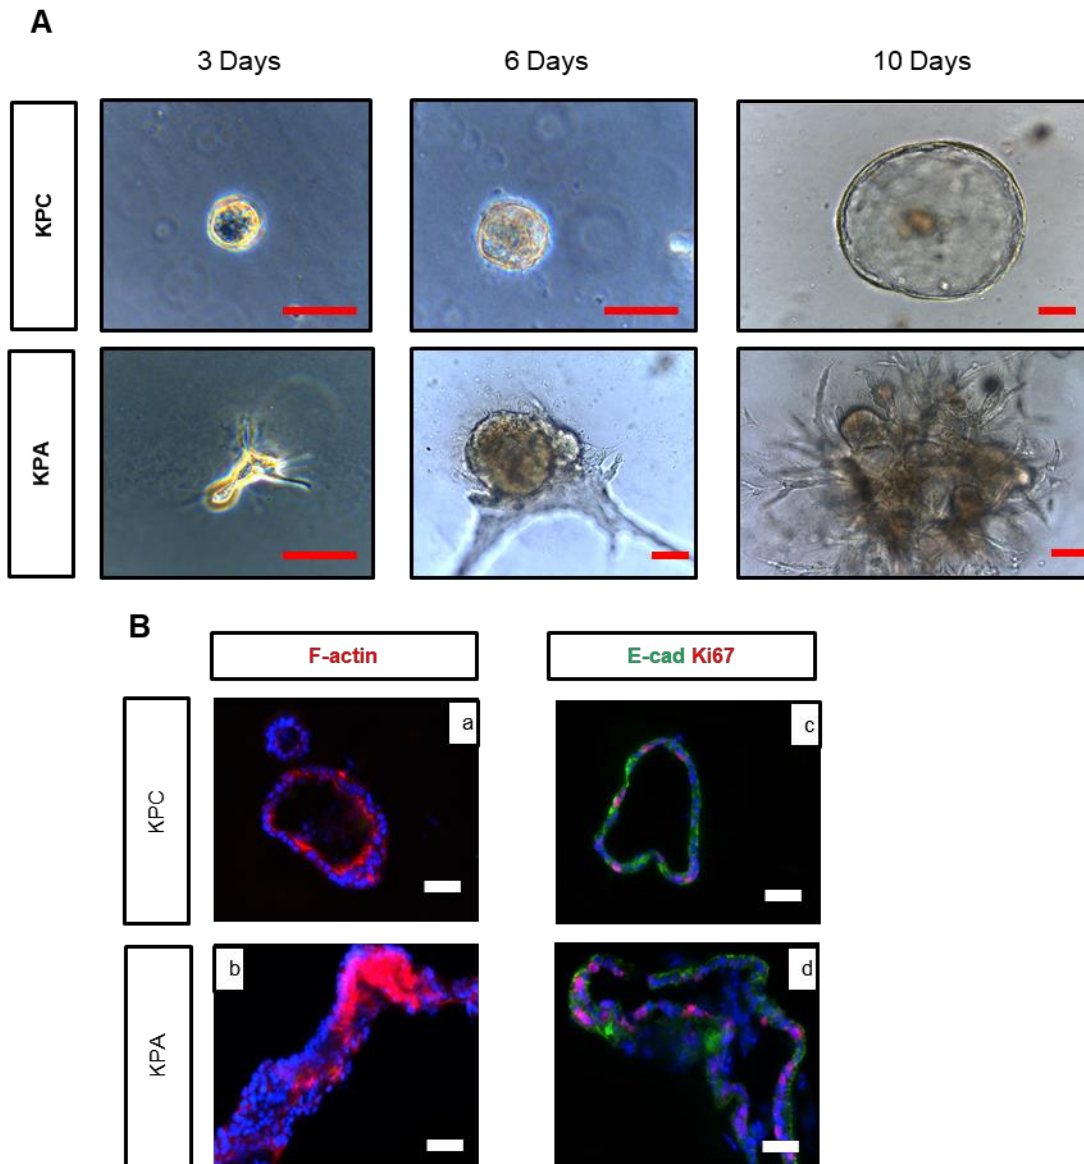

**Figure S4. Time-dependent growth of the organoids with proliferative activity and distorted structure.** (A) Cancer cells were embedded in growth factor-reduced Matrigel and cultured in DMEM medium supplemented with B27, 1.25 mM N-Acetylcysteine, 10 nM gastrin and the growth factors: 50 ng/ml EGF, 10% R-spondin 1, 100 ng/ml Noggin, 100 ng/ml FGF10 and 10 mM nicotinamide. The pictures showed the growth of an organoid generated from the KPC and KPA cancer cells at different days after culture. Scale bars represent 75  $\mu$ m. (B) The organoids established from the KPC and KPA cancer cells were processed for cryosection. The distribution and signal intensity of F-actin, E-cadherin and Ki-67 was studied by IF staining. Scale bars represent 50  $\mu$ m.

Figure S5

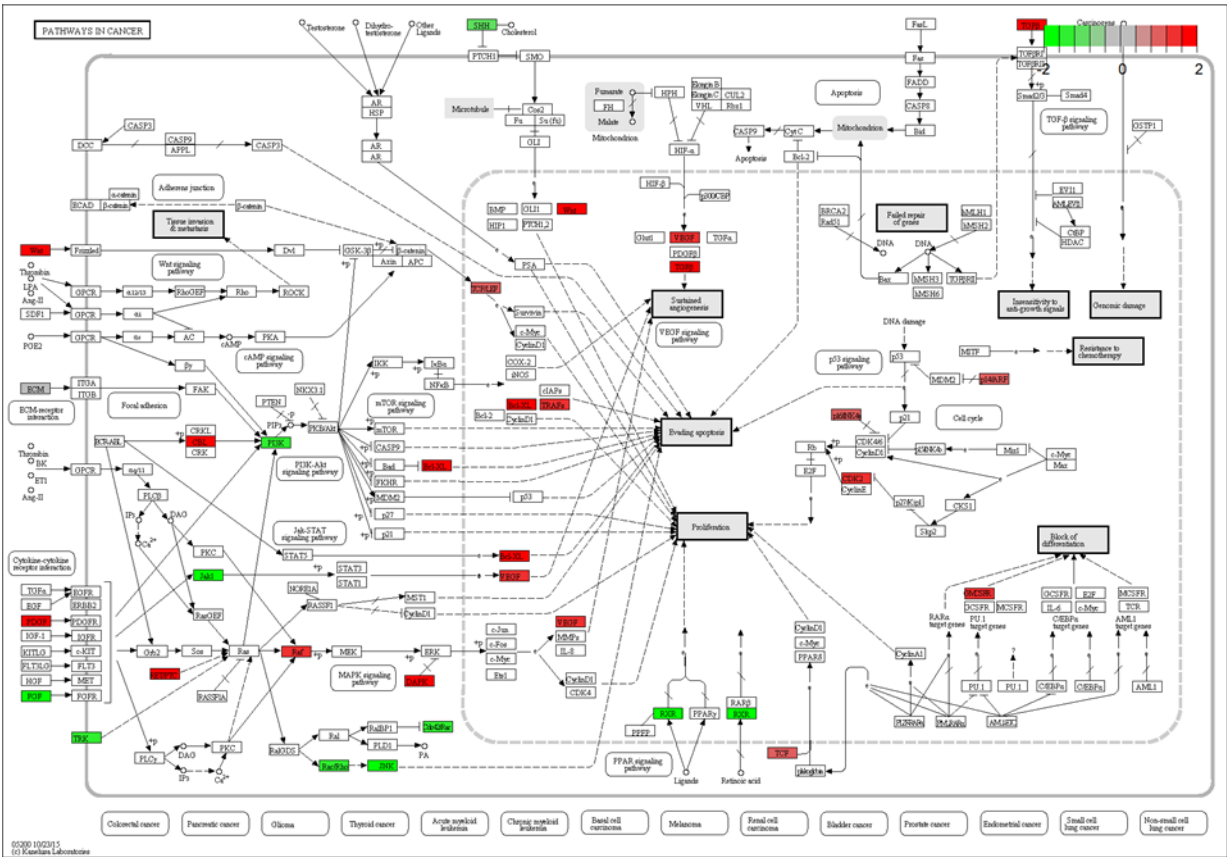

**Figure S5. Upregulation of PDGF, VEGF, TGF- $\beta$  and WNT signaling pathways in the KPA cancer cells.** Gene expression profile of the KPC and KPA cancer cells was studied by cDNA microarray and the differentially upregulated pathways were shown. The upregulated genes are marked by red color and the downregulated genes are marked by green color.

**Figure S6**

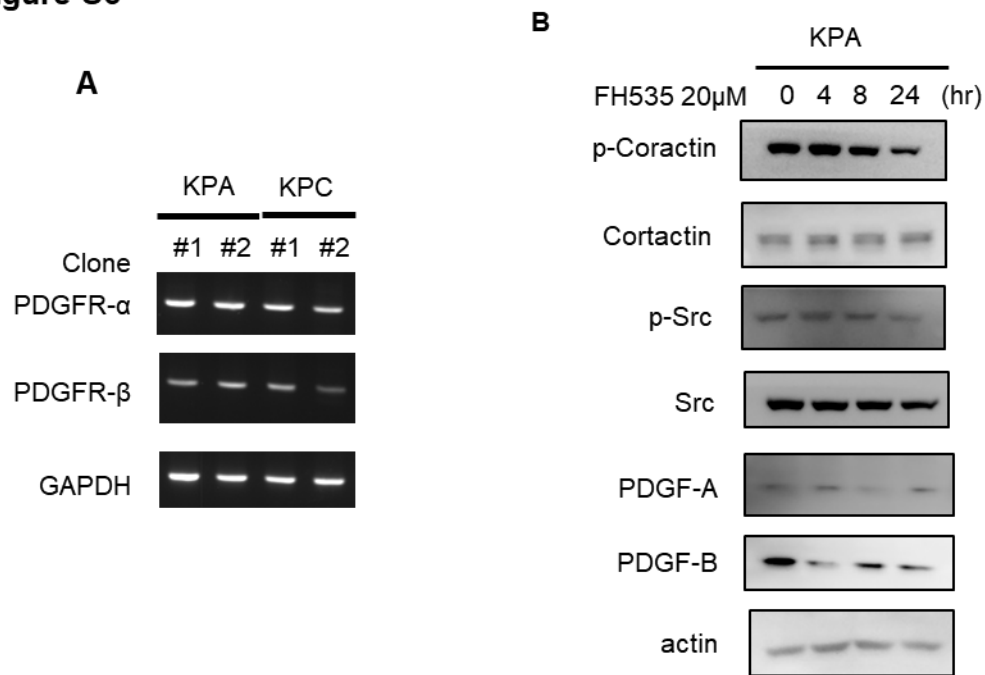

**Figure S6. Inhibition of PDGF-B production, Src activation, and cortactin phosphorylation by a  $\beta$ -catenin inhibitor FH535 in the KPA cancer cells.** (A) Expression of PDGFR- $\alpha$  and PDGFR- $\beta$  in the KPC and KPA cancer cells. Total RNAs were extracted from the KPC and KPA cancer cells and expression of PDGFR- $\alpha$  and PDGFR- $\beta$  was studied by RT-PCR assay. (B) The KPA cancer cells were treated with FH535 (20 $\mu$ M) for different times and cellular proteins were harvested for analysis. Phosphorylation of Src and cortactin and intracellular level of PDGF-A and PDGF-B were investigated by Western blotting.

**Figure S7**

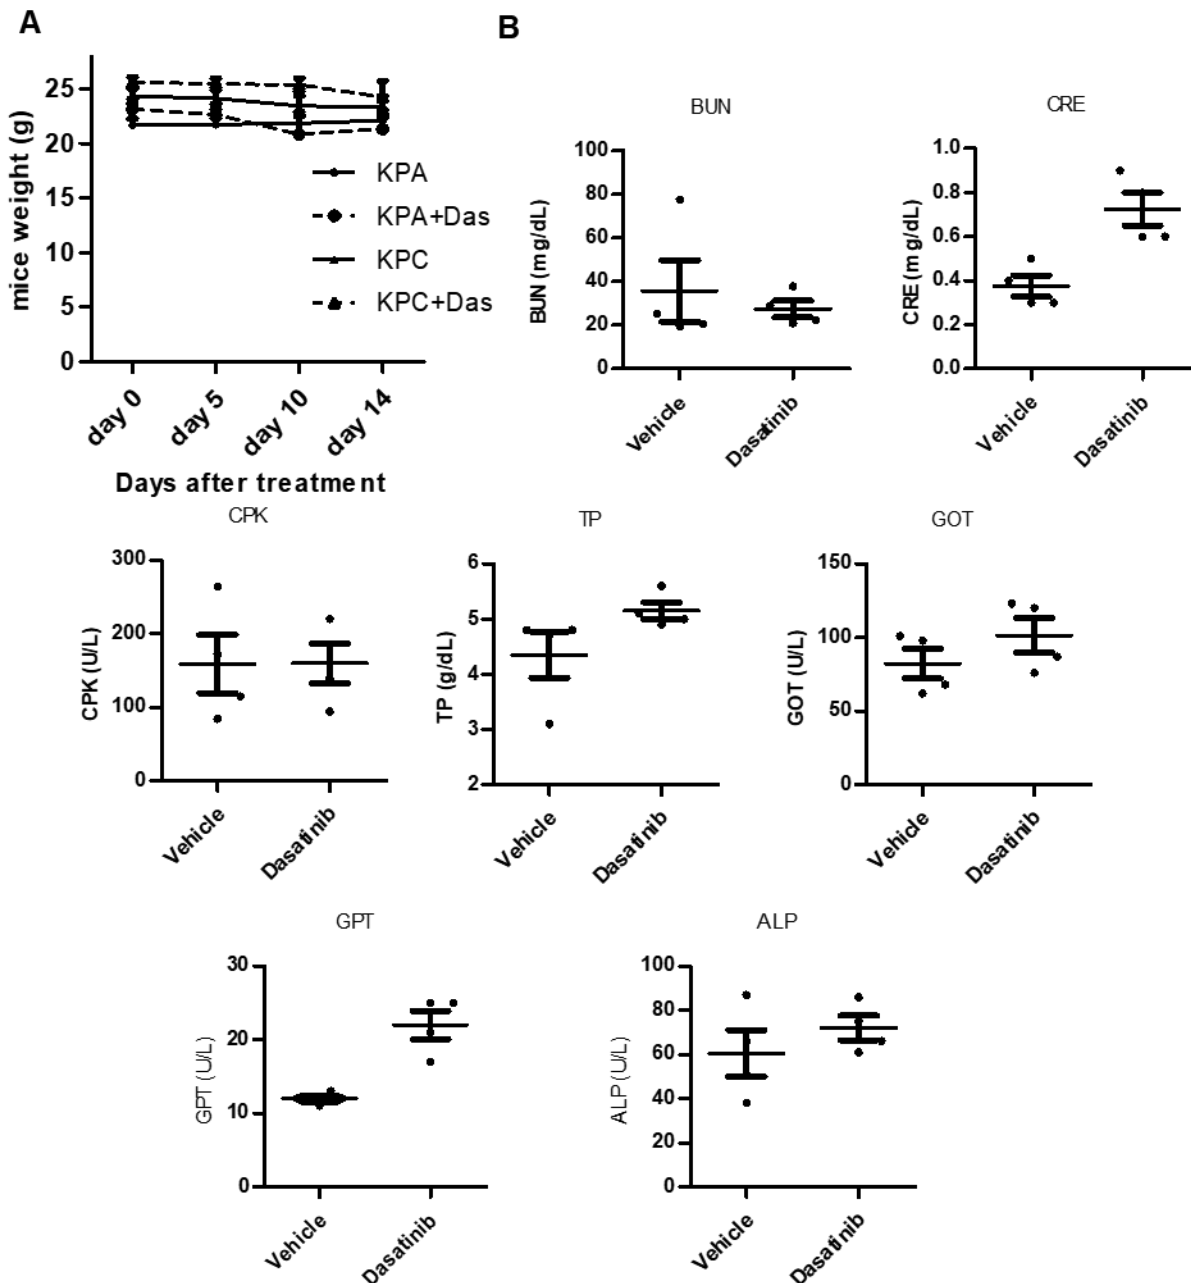

**Figure S7. Change of blood chemistry parameters in the KPA mice received PBS or dasatinib treatment for two weeks.** Luciferase-tagged KPC and KPA cancer cells ( $1 \times 10^6$  cells) were injected into the pancreas of mice. After 1 week (day 0), PBS or dasatinib (10 mg/kg) were given to mice by oral gavage daily for 2 weeks, and body weight of the mice was measured every 5 days. (A) Change of body weight of the KPC and KPA mice received PBS or dasatinib treatment for two weeks. (B) Blood samples were collected at animal sacrifice and blood chemistry parameters were analyzed by Fuji Dri-Chem 4000i autoanalyzer of the Taiwan Mouse Clinic (Taipei, Taiwan). Error bars are the means  $\pm$  s.e.m. (n=5). ALP: Alkaline Phosphatase; BUN: blood urea nitrogen; CRE: creatinine; CPK: Creatine-phospho-kinase; GOT: glutamate oxaloacetate transaminase; GPT: glutamate pyruvate transaminase; TP: total protein.

**Figure S8**

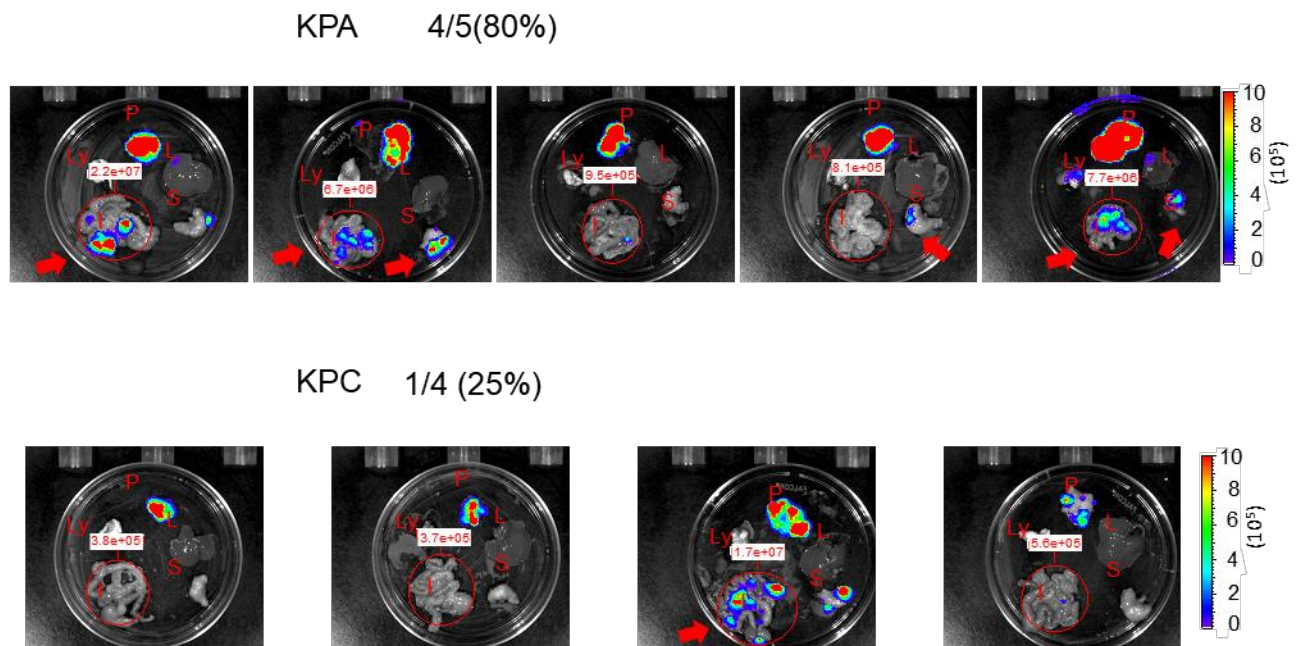

**Figure S8. Metastasis of pancreatic tumors to various organs in the KPA and KPC mice.** Luciferase-tagged KPC and KPA cancer cells ( $1 \times 10^6$  cells suspended in 50  $\mu$ L Hank's balanced salt saline) were injected into the pancreas of the mice. Organs including pancreas, liver, intestine, stomach were collected from the mice injected with d-luciferin (150 mg/kg in saline) before sacrifice. Red arrow indicates the metastatic tumors in the organs.

**Table S1. Summary of the information and the metastatic status of the KPA mice (n=15).**

| ID    | Age     | sex   | Ascites | Intest | Stoma | Liver | Lung |
|-------|---------|-------|---------|--------|-------|-------|------|
|       | (weeks) |       |         |        | meta  |       |      |
| 1126  | 11      | F     | N       | Y      | N     | N     | N    |
| 1100  | 11      | M     | Y       | Y      | N     | Y     | N    |
| 1791  | 11      | F     | Y       | Y      | Y     | N     | N    |
| 2010  | 12      | F     | N       | Y      | N     | Y     | N    |
| 2006  | 15      | F     | Y       | Y      | Y     | Y     | Y    |
| 21    | 15      | F     | N       | Y      | Y     | N     | N    |
| 2470  | 10      | F     | N       | N      | N     | N     | Y    |
| 2413  | 15      | M     | Y       | Y      | N     | Y     | N    |
| 2473  | 15.5    | M     | Y       | N      | N     | N     | Y    |
| 2009  | 8.5     | F     | N       | Y      | N     | Y     | N    |
| 2067  | 12      | F     | Y       | Y      | Y     | N     | N    |
| 2232  | 6       | M     | N       | Y      | N     | N     | N    |
| 2378  | 14      | F     | Y       | Y      | Y     | N     | Y    |
| 1127  | 16      | M     | Y       | N      | N     | Y     | Y    |
| 2373  | 7       | M     | N       | N      | N     | N     | N    |
| Total | 11.93   | 06:09 | 47%     | 73%    | 33%   | 40%   | 33%  |

**Table S2. 20 patient with serum clinicopathological features**

| Characteristic        | PDGF+pSrc |            | Other |            | P                  |
|-----------------------|-----------|------------|-------|------------|--------------------|
| Age, median (range)   | 65        | (52~77)    | 62    | (41~85)    |                    |
| Sex                   |           |            |       |            | <b>&lt; 0.0001</b> |
| Male                  | 4         | 44%        | 8     | 73%        |                    |
| Female                | 5         | 56%        | 3     | 27%        |                    |
| Tumor Location        |           |            |       |            | 0.7719             |
| Uncinate              | 2         | 22%        | 3     | 27%        |                    |
| Head                  | 4         | 44%        | 5     | 45%        |                    |
| Neck                  | 0         | 0%         | 0     | 0%         |                    |
| Body/tail             | 3         | 33%        | 3     | 27%        |                    |
| Tumor Location        |           |            |       |            | 0.3545             |
| Uncinate/Head         | 6         | 67%        | 8     | 73%        |                    |
| Neck/Body/tail        | 3         | 33%        | 3     | 27%        |                    |
| Tumor size            |           |            |       |            | <b>0.015</b>       |
| < 3 cm                | 3         | 33%        | 2     | 18%        |                    |
| ≥ 3 cm                | 6         | 67%        | 9     | 82%        |                    |
| Lymph nodes status    |           |            |       |            | 0.2482             |
| Negative              | 4         | 44%        | 4     | 36%        |                    |
| Positive              | 5         | 56%        | 7     | 64%        |                    |
| Stage                 |           |            |       |            | <b>0.0021</b>      |
| T2                    | 0         | 0%         | 1     | 9%         |                    |
| T3                    | 9         | 100%       | 10    | 91%        |                    |
| Stage N               |           |            |       |            | 0.6554             |
| N0                    | 3         | 33%        | 4     | 36%        |                    |
| N1                    | 6         | 67%        | 7     | 64%        |                    |
| Recurrence            |           |            |       |            | 1                  |
| Yes                   | 9         | 100%       | 11    | 100%       |                    |
| No                    | 0         | 0%         | 0     | 0%         |                    |
| CEA,median (range)    | 7.17      | (1.5~20)   | 8.82  | (0.8~12)   |                    |
| < 5                   | 5         | 56%        | 5     | 45%        | 0.1198             |
| ≥ 5                   | 4         | 44%        | 6     | 55%        |                    |
| CA19-9,median (range) | 1386      | (0.6~6730) | 605   | (0.6~4396) |                    |
| < 37                  | 2         | 22%        | 7     | 64%        | <b>&lt; 0.0001</b> |
| ≥ 37                  | 7         | 78%        | 4     | 36%        |                    |

**Table S3. Correlation between PDGF/p-Src coexpression and clinicopathological features**

| Characteristic        | PDGF+pSrc |            | Other |            | <i>P</i>           |
|-----------------------|-----------|------------|-------|------------|--------------------|
| Age, median (range)   | 64        | (41~77)    | 61    | (38~85)    |                    |
| Sex                   |           |            |       |            | <b>&lt; 0.0001</b> |
| Male                  | 5         | 38%        | 43    | 67%        |                    |
| Female                | 8         | 62%        | 21    | 33%        |                    |
| Tumor Location        |           |            |       |            | 0.2026             |
| Uncinate/Head         | 9         | 69%        | 49    | 77%        |                    |
| Neck/Body/tail        | 4         | 31%        | 15    | 23%        |                    |
| Tumor size            |           |            |       |            | <b>0.0105</b>      |
| < 3 cm                | 6         | 46%        | 41    | 64%        |                    |
| ≥ 3 cm                | 7         | 54%        | 23    | 36%        |                    |
| Stage                 |           |            |       |            | 0.0817             |
| T2                    | 1         | 8%         | 10    | 16%        |                    |
| T3                    | 12        | 92%        | 54    | 84%        |                    |
| Stage N               |           |            |       |            | <b>0.0466</b>      |
| N0                    | 5         | 38%        | 33    | 52%        |                    |
| N1                    | 8         | 62%        | 31    | 48%        |                    |
| Resection Margin      |           |            |       |            | 0.1153             |
| R0                    | 10        | 77%        | 50    | 78%        |                    |
| R1                    | 2         | 15%        | 13    | 20%        |                    |
| R2                    | 1         | 8%         | 1     | 2%         |                    |
| Recurrence            |           |            |       |            | <b>&lt; 0.0001</b> |
| Yes                   | 12        | 92%        | 44    | 69%        |                    |
| No                    | 1         | 8%         | 20    | 31%        |                    |
| CEA,median (range)    | 527.8     | (1.5~6086) | 14    | (0.1~494)  |                    |
| < 5                   | 8         | 62%        | 48    | 75%        | <b>0.0478</b>      |
| ≥ 5                   | 5         | 38%        | 16    | 25%        |                    |
| CA19-9,median (range) | 1095      | (0.6~6730) | 442   | (0.6~5266) |                    |
| < 37                  | 3         | 23%        | 19    | 30%        | 0.2621             |
| ≥ 37                  | 10        | 77%        | 45    | 70%        |                    |

**Table S4. Somatic mutations of *RNF43* and *Axin1* in clinical patients.**

| <b>Paitient number</b> | <b>Gene</b>  | <b>Mutation</b>      | <b>Exon</b> | <b>Nucleotide</b> | <b>Protein</b> | <b>PDGF/p-Src</b> |
|------------------------|--------------|----------------------|-------------|-------------------|----------------|-------------------|
| 58                     | <i>RNF43</i> | Frameshift deletion  | Exon8       | 198delT           | 66fs           | High              |
| 60                     | <i>RNF43</i> | Frameshift insertion | Exon5       | 515insT           | 172fs          | Low               |
| 71                     | <i>RNF43</i> | Frameshift deletion  | Exon8       | 184delT           | 62fs           | High              |
| 90                     | <i>RNF43</i> | Frameshift insertion | Exon5       | 513insTC          | 171fs          | High              |
| 85                     | <i>RNF43</i> | Misssense            | Exon2       | A1058T            | L353H          | Low               |
| 54                     | <i>Axin1</i> | Nonsense             | Exon3       | C1072A            | E358*          | High              |
| 55                     | <i>Axin1</i> | Misssense            | Exon3       | G1057A            | R353S          | High              |
| 68                     | <i>Axin1</i> | Misssense            | Exon7       | G2101A            | P701S          | Low               |
| 71                     | <i>Axin1</i> | Misssense            | Exon3       | C1058G            | R353P          | High              |
| 79                     | <i>Axin1</i> | Misssense            | Exon6       | C1916T            | G639E          | High              |
| 90                     | <i>Axin1</i> | Frameshift insertion | Exon3       | 1093insA          | 365fs          | High              |

**Table S5. List of the primary antibodies used in this study, and information on working dilutions of antibodies in Western blotting (WB), immunohistochemistry (IHC) and immunofluorescence (IF).**

| Antigen             | Species | Source                    | Catalog#   | Dilution        |        | Application |    |
|---------------------|---------|---------------------------|------------|-----------------|--------|-------------|----|
| E-cadherin          | Mouse   | BD Biosciences            | 610182     | 1:100           |        | IHC         |    |
| $\beta$ -catenin    | Mouse   | Santa Cruz biotechnology  | sc-7963    | 1:50            | 1:200  | IHC         | WB |
| CK19                | Mouse   | LifeSpan BioSciences,Inc  | LS-C180321 | 1:100           |        | IHC         |    |
| $\alpha$ -SMA       | Mouse   | Sigma                     | A2547      | 1:100           |        | IHC         |    |
| PDGF-A              | Rabbit  | Santa Cruz biotechnology  | sc-128     | 1:50            | 1:200  | IHC         | WB |
| PDGF-B              | Rabbit  | Genetex                   | GTX100683  | 1:100           | 1:1000 | IHC         | WB |
| PDGFR $\alpha$      | Rabbit  | Genetex                   | GTX107903  | 1:1000          |        | WB          |    |
| PDGFR $\beta$       | Mouse   | Santa Cruz biotechnology  | SC-374573  | 1:200           |        | WB          |    |
| p-PDGFR $\beta$     | Rabbit  | LifeSpan BioSciences,Inc  | LS-C178098 | 1:500           |        | WB          |    |
| ki67                | Rabbit  | Spring Bioscience         | M3060      | 1:100           |        | IF          |    |
| Phalloidin(F-actin) |         | Invitrogen                | A12381     | 1:100           |        | IF          |    |
| p-Cortactin         | Rabbit  | Cell Signaling Technology | #4569s     | 1:100           | 1:1000 | IF<br>WB    |    |
| Cortactin           | Rabbit  | Genetex                   | GTX100253  | 1:1000          |        | WB          |    |
| p-Src               | Rabbit  | cell signaling technology | #6943      | 1:100<br>1:1000 |        | IHC         | WB |
| Src                 | Mouse   | Upstate                   | 05-184     | 1:1000          |        | WB          |    |
| p-Erk               | Rabbit  | Cell Signaling Technology | #4370      | 1:1000          |        | WB          |    |
| Erk                 | Rabbit  | Cell Signaling Technology | #4695      | 1:1000          |        | WB          |    |
| p-FAK               | Rabbit  | Cell Signaling Technology | #8556      | 1:1000          |        | WB          |    |
| FAK                 | Mouse   | BD Biosciences            | 610087     | 1:1000          |        | WB          |    |
| GAPDH               | Mouse   | Abcam                     | ab9485     | 1:2000          |        | WB          |    |
| p-Tyrosine          | Mouse   | Upstate                   | 05-321     | 1:1000          |        | WB          |    |
| $\beta$ -Actin      | Mouse   | Chemicon                  | MAB1501    | 1:5000          |        | WB          |    |
| APC                 | Rabbit  | Genetex                   | GTX116009  | 1:1000          |        | WB          |    |

**Table S6 . List of the primers used in this study.**

| Gene name                       | Forward Sequence        | Reverse Sequence        |
|---------------------------------|-------------------------|-------------------------|
| <i>TGF-<math>\beta</math>1</i>  | TGATACGCCTGAGTGGCTGTCT  | CACAAGAGCAGTGAGCGCTGAA  |
| <i>TGF-<math>\beta</math>2</i>  | TTGTTGCCCTCCTACAGACTGG  | GTAAAGAGGGCGAAGGCAGCAA  |
| <i>TGFBR3</i>                   | TCTCCGCTGAATGGCTGTGGTA  | CCGACTCCAAATCTTCGTAGCC  |
| <i>PDGF-A</i>                   | CTGGCTCGAAGTCAGATCCACA  | GACTTGTCTCCAAGGCATCCTC  |
| <i>PDGF-B</i>                   | AATGCTGAGCGACCACTCCATC  | TCGGGTCATGTTCAAGTCCAGC  |
| <i>PDGF-C</i>                   | GAGTCCAACCTGAGCAGCAAGT  | GAAACTTCGGGCTGTGGATGCT  |
| <i>PDGF-D</i>                   | CTGTCAACTGGAAGTCCTGCAC  | CCCTTCTCTTGAAATGTCCAGGC |
| <i>PDGFR<math>\alpha</math></i> | GCAGTTGCCTTACGACTCCAGA  | GGTTTGAGCATCTTCACAGCCAC |
| <i>PDGFR<math>\beta</math></i>  | GTGGTCCTTACCGTCATCTCTC  | GTGGAGTCGTAAGGCAACTGCA  |
| <i>GAPDH</i>                    | CATCACTGCCACCCAGAAGACTG | ATGCCAGTGAGCTTCCCGTTCAG |
| <i>ACTIN</i>                    | ACCATCGGCAATGAGCGTTTCC  | GCTGTTGTAGGTGGTCTCATGG  |
| <i>TCF4</i>                     | CCTCCAATCCTTCAACTCCTGTG | TCCAAACGGTCTTCGATTCGGC  |
